# Supplementary material for: The Emerging Role of Fatty Acid Synthase in Hypoxia‐Induced Pulmonary Hypertensive Mouse Energy Metabolism
Source: Hindawi journal article supplement (doi:10.1155/2021/9990794), 2021-01-01

**Control**

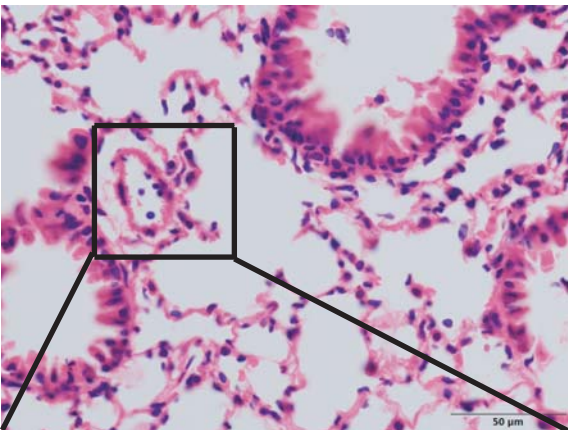

**Hypoxia**

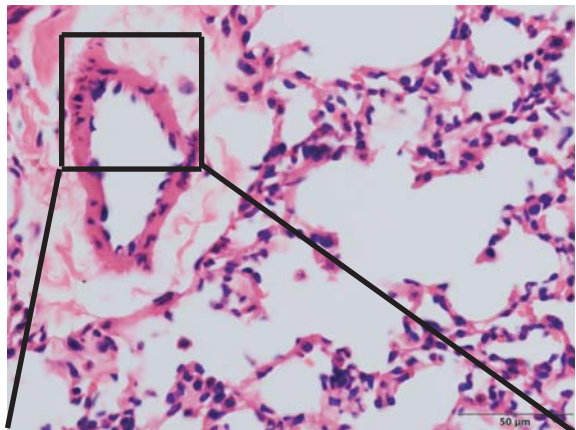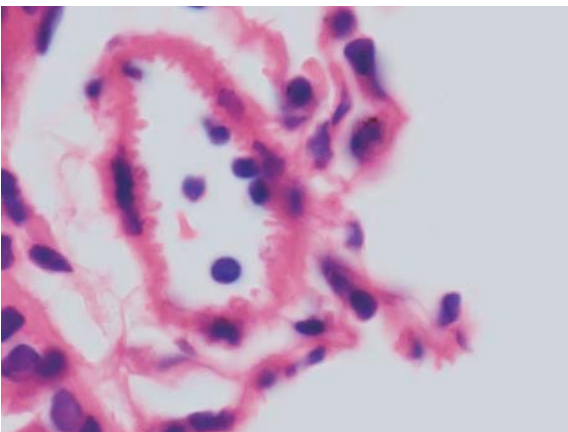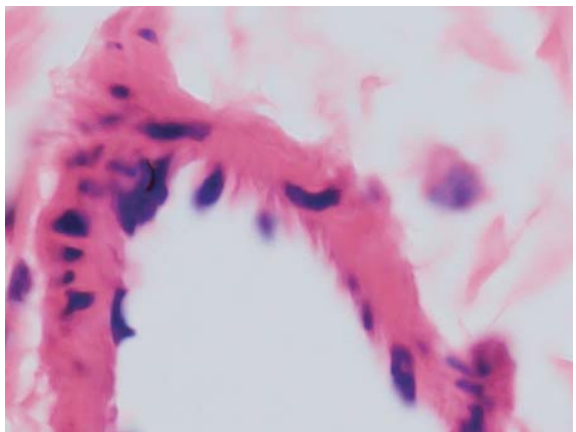

Supplement: f1 [file 9990794.f1.pdf]
